# Supplementary material for: Dynamics of ammonia oxidizers and denitrifiers in response to compost addition in black soil, Northeast China
Source: PeerJ. 2020 Apr 21;8:e8844. doi: 10.7717/peerj.8844 (PMC7182023; doi:10.7717/peerj.8844)
Supplement: Supplemental Information 2 [file peerj-08-8844-s002.xlsx]

## Sheet: Sheet1
NH4+-N content						NO3--N
	CK	LC	MC	HC			CK	LC	MC	HC
seedling	57.5994	51.8654	56.3896	41.6002		seedling	14.9365	25.2458	32.4969	87.4266
seedling	80.6145	49.8523	75.1679	57.5672		seedling	40.2387	40.4325	29.5441	57.2507
seedling	43.3444	92.5724	45.6535	39.4024		seedling	18.4818	16.4933	30.7641	38.6183
seedling	89.9477	45.4855	49.7321	41.8764		seedling	16.4323	26.1012	33.7285	64.9947
Flowering	61.3617	54.5177	73.9861	63.3789		Flowering	18.6823	31.8153	20.8626	21.9045
Flowering	38.5458	69.4043	39.9989	44.8758		Flowering	13.4536	21.686	17.9601	21.5377
Flowering	51.6129	51.7282	41.0886	38.4555		Flowering	17.3335	13.2514	20.0432	19.8495
Flowering	60.9356	42.8643	37.3124	57.9238		Flowering	18.7335	25.8952	20.2384	24.5965
Mature	32.9794	27.8791	27.5352	31.8383		Mature	18.7909	31.833	31.9173	29.0418
Mature	30.3291	28.2713	31.8552	28.6713		Mature	29.4058	22.0877	21.5967	35.2163
Mature	57.8326	39.4053	31.8825	30.2339		Mature	22.739	22.6481	25.5286	36.3516
Mature	37.7386	41.9443	29.7648	29.6039		Mature	16.6178	28.2519	40.4046	28.7089
